# Supplementary material
Source: PubMed Central journal article supplement (PMC2736361)
Supplement: NIHMS105808-supplement-supplement_1.pdf [file NIHMS105808-supplement-supplement_1.pdf]

Figure S1

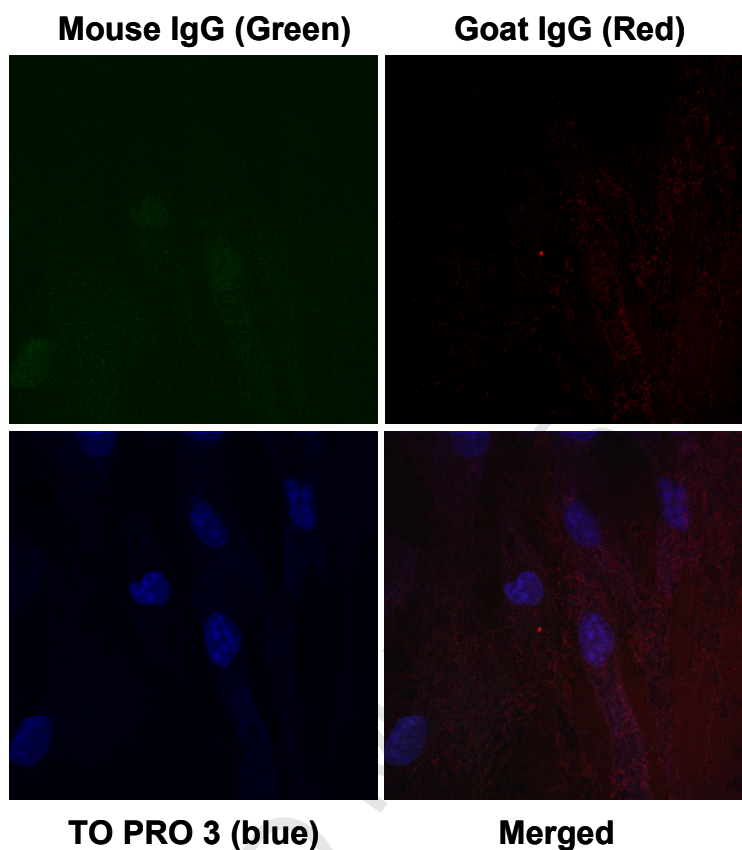**Supplementary Figure Legend**

**Figure S1.** Negative controls of Immunostaining and confocal microscopy. Mouse and goat IgGs in place of primary antibodies were used as negative controls in immunostaining protocol as described in Materials and Methods. Secondary antibodies were: donkey anti-goat IgG (594) and donkey anti-mouse IgG (488). TO PRO 3 (blue) was used for counterstaining of nuclei. Pictures were taken by using Zeiss LSM 510 UV META Laser Scanning Confocal Microscope.
